# Supplementary material for: Genomic Copy Number Dictates a Gene-Independent Cell Response to CRISPR/Cas9 Targeting
Source: Oxford University Press journal article supplement (doi:10.1158/2159-8290.cd-16-0154), 2016-06-03
Supplement: 21598290cd160154-sup-161988_1_supp_3499403_17xyd1.xlsx [file 21598290cd160154-sup-161988_1_supp_3499403_17xyd1.xlsx]

## Sheet: Positive_controls_Achv3.3
Supplementary Table 2: Positive control sgRNAs and target genes
Name	Gene Symbol
CCCACTACAGGTAAAGTCCA	FAU
CCTTCTCCAGGTGGCCAAAC	FAU
CTACACACCTTCGAGGTGAC	FAU
CTGACTACCCTGGAAGTAGC	FAU
CTGCTACTTCCAGGGTAGTC	FAU
TGATCTGGGCGACCGTTTCC	FAU
CCATCATTGTTCTTCTGTGA	MRPL13
CCTTCACAGAAGAACAATGA	MRPL13
GCCATAGCAGCAAGTTTGCC	MRPL13
GTTACTTGTCTAAATCCACC	MRPL13
TTACTCAGTGCATGGTACAC	MRPL13
TTACTGCCACTGGATCCCTC	MRPL13
ACCCTCCAGACTGTCCGCTA	MRPL10
ACTACTTACCAGGGACACCT	RPL10
CAAGTTTCCTGGCCGCCAGA	RPL10
CTACATACCTTCTGGCGGCC	RPL10
GATAGCCGTCTGCCAGAATG	MRPL10
GTCGTGTGATGCACTTTCAG	MRPL10
GTGCCATTCCTGCCGCTGCT	MRPL10
GTGGATGAGTTTCCGCTTTG	RPL10
TATGAGCAGCTGTCCTCTGA	RPL10
TCACCTGTCAGCCCCAGCAC	RPL10
TTCAGGAGATAGGCCTCATC	MRPL10
ACCCACTCACCTTCTTCATT	RPL10A
CTCACTTGCGGCGCTTGCGC	RPL10A
CTCTCGAAGGTTCCTGGAGA	RPL10A
CTCTCGCGACACCCTGTACG	RPL10A
TAAGTTCTCTGTGTGTGTCC	RPL10A
TTTCCTGCCTTATTTAAACC	RPL10A
AAAGTGGATGAGTTCCCACT	RPL10L
ATATGAATCTTCTGGCGTCC	RPL10L
ATGGCTTTCACATGCGAGTG	RPL10L
CACAAATACGGGCGGCCTCC	RPL10L
GCCGTCCAGCTCGCTGTTAC	RPL10L
GCGAGCTGGACGGCGCCCCA	RPL10L
ATCTCCATGAAGGATCCAAG	MRPL11
CACACTGAACTTCTCCCACT	MRPL11
CATGCGCTGGTTCCAGCAGA	RPL11
CATTGAACTCCTTGCAAAAC	MRPL11
CTGGCCCTCACCTGTTTGCC	MRPL11
GATTGCCCGCATCAAAGCTC	MRPL11
GCAGCAGGATCAAGGTGAAA	RPL11
GCATCGCAGACAAGAAGCGC	RPL11
GCTGTCCACTGCACAGTTCG	RPL11
TACTCACCTTTGGAAAACAC	RPL11
TGGAGCGGACAACAGACGAC	MRPL11
TTCATACCACATAGAAGTCC	RPL11
ATGTGTCCGTTCTTTCGCTA	MRPL12
CAAGATCGGCCCCCTGGGTC	RPL12
CTGGGCCTGTCTGTTCTGAA	RPL12
CTTCGCCTCGGTCAGGCGGA	MRPL12
GCTGCTCCTCATATGTCGCA	MRPL12
GGATAACGTACCAGACCCAG	RPL12
GGTGGGCGGCACCGTGGTTC	MRPL12
GTCGGGCTTGTGCCGATGGG	MRPL12
TCTGTGCCGTGCGACATATG	MRPL12
TCTTCTGCAGTTAAACACAG	RPL12
TTCTAGTCTCCAAAAAAAGT	RPL12
AGCCGGCCCGTAAGATCCGC	RPL13
CCATCATTGTTCTTCTGTGA	MRPL13
CCTTCACAGAAGAACAATGA	MRPL13
GCCATAGCAGCAAGTTTGCC	MRPL13
GGCCACCTTCTTGTGAATGC	RPL13
GGGCTCACCTGCGGATCTTA	RPL13
GGTGGCCGGCATTCACAAGA	RPL13
GTTACTTGTCTAAATCCACC	MRPL13
TCTCCACCAGACGTAAGGCC	RPL13
TTACTCAGTGCATGGTACAC	MRPL13
TTACTGCCACTGGATCCCTC	MRPL13
CAGTACCTGTTTAGCCACGA	RPL13A
CATCCCACCGCCCTACGACA	RPL13A
CCACAGGTCCTGGTGCTTGA	RPL13A
CCTCCCTCTAGGCCGGAAGG	RPL13A
CCTCTCCCTAGTGAAGTACC	RPL13A
GCATAGCTCACCTTGTCGTA	RPL13A
ACGATCAAAATCTGTCATCT	RPL14
GTGTTCTAGGCTTTGGTCGA	RPL14
GTTACCTGTGCGGAAACTTG	RPL14
TCATCCTCAAGTTTCCGCAC	RPL14
TTCTCTGGCTTCAATCTTCT	RPL14
CACCAACCCAGTAAGAATTC	RPL15
CCGGCCCCGCTTGGGCTTTG	MRPL15
CCTTCGTTAAACCCGTATTT	MRPL15
GACTTACCTCCTCAACCAGC	MRPL15
GATTCGGCTTTAAGTTGGCC	MRPL15
GCCAACTTAAAGCCGAATCC	MRPL15
GCTTGGCCTTGTAGCCCAGT	RPL15
GGGTGCATACAAGTACATCC	RPL15
GTGTAGGTTACGTTATATAT	RPL15
TGACCATCCAGCCACTTAAA	MRPL15
TGCTCAAACCCGGGAGACAG	RPL15
TTACCTCTGCAACGGACTGA	RPL15
ACGAACGCATCGAGGCACCA	MRPL17
AGAGAGTAATGCTGAACTTA	RPL17
CAACTCCACCATTGTAACGT	RPL17
CCCGATCCAAACTCCGATTT	MRPL17
CTTAAAGTGAACACGAAGAT	RPL17
GTAAGGTGGCTGTCTCTGCG	MRPL17
GTACCATTCCGACGTTACAA	RPL17
TAACGAACGAGCCATGCGCA	MRPL17
TCCTCACAGCTCATCGACTA	MRPL17
TGGCCGCGTATTTCGCCGTA	MRPL17
TTGTGTCCAGCCCCATTGCT	RPL17
TTTCTAGCATGCAAATCAAG	RPL17
AACCACACCACCTTCTGTCA	MRPL18
AACCCGCACATCATCAGTTA	RPL18
AGCCACTCACCATCCGGGAA	RPL18
AGTGGACATCCGCCATAACA	RPL18
CCGGGAAAACAAGACGGCCG	RPL18
CCTCCAGTTATACAGGTTTC	RPL18
CTACCAACCAACCCCGTGGG	MRPL18
CTACCTGAGGCTGTTGGTCA	RPL18
TCCACTTCAGGTTTCGCTGC	MRPL18
TCGTCTCAGCGATGGCGCTT	MRPL18
TGAGAGTATAGGACGAGTGC	MRPL18
ACGTGGAACTGCTTGACAGC	RPL18A
CTTTCAGCTACGAGAGTACA	RPL18A
GCACTGGGTGACAGCGCCTG	RPL18A
TGTTTGAGAAGTCCCCCCTG	RPL18A
ATAACCCATACCTCATTAAC	MRPL19
CGATTTCATTGGTCTCATTG	RPL19
CGTGGACAAGCACCGCCCCG	MRPL19
CTTACGCCAGGAGCTTCTTG	RPL19
CTTCTCCACAGGTAAGCGGA	RPL19
CTTTCCCAGGTCAGCAGATC	RPL19
GCCCATCTTTGATGAGCTTC	RPL19
GTACTCACGGGAGTTGGCAT	RPL19
GTCCTGAATTCATTCCTCGA	MRPL19
GTTCCAACCGCCGCCGAAAC	MRPL19
TACTGACCAACATAGAACTC	MRPL19
TGGTTAGGCTCTTGTACTAC	MRPL19
AATGAACTAGACCTTGCGTG	MRPL21
ACCTTCGAGAAGCAGACCAA	MRPL21
CAACAATGCCAACAGCATGC	RPL21
CCCTTTGGTCTGCTTCTCGA	MRPL21
CGACCCCGCAGACTGTCCTC	MRPL21
CTTATAGATTCGCATATATG	RPL21
GGAATGGGTACTGTTCAAAA	RPL21
GTATGGCAGGCTCTTTGCCG	MRPL21
TATATGCGAATCTATAAGAA	RPL21
TGTTCTGCCAGACCCAGTTG	MRPL21
AGCCGGGGGAAGCTGGCCTT	MRPL22
ATCAAAGTGAACGGAAAAGC	RPL22
CATACTAACCACAGGAGCCA	RPL22
CGCTGCCGCCATGGCTCCTG	RPL22
CGTTATGGATACATAACCTG	MRPL22
CTTGCTCTTGCTCCTTTCGA	RPL22
GAACTTACTGCTGGTCTCCG	MRPL22
GAGACCATAACGTGGAATTC	MRPL22
GTTTATCCTCCACAACTGCC	MRPL22
TCCATGATTCCATCTTCTAC	RPL22
TCTCTTAGAAGCACAAGATA	MRPL22
TGCACCCACCCTGTAGAAGA	RPL22
AAGGTCCAAATTAAACCTCC	RPL22L1
CACGAAGATTGTTCTTCTTA	RPL22L1
CTTACTCATCCAGTAGAAGA	RPL22L1
GTTAAAGTCAATGGCAAAAC	RPL22L1
TAAAATAGGAGCAATTTCTA	RPL22L1
TCGAGTGGTTGCATCTGACA	RPL22L1
AATCCGGAATTTCGCACCAG	RPL23
CAAGGTCGCCTACGTGCAGC	MRPL23
CAATTGATTACAGCTCCTAC	RPL23
CACACGCACCAGCTGCACGT	MRPL23
CCTGTATATCATCTCCGTGA	RPL23
CGTGCAGTTCCGGATCCCCA	MRPL23
CGTTGTCGAATGACCACTGC	RPL23
GCACGTTATAGATGCCCTCG	MRPL23
GCGTTCAAGATGTCGAAGCG	RPL23
GGGCATCTATAACGTGCCCG	MRPL23
TCTCTCAGTACATCCAGCAG	RPL23
TTCGGAACACCCGAAGTTGT	MRPL23
ACACCTTCCTTCTTCGCTTT	RPL23A
CAGTACTGACTTGTTTCTCC	RPL23A
CCGAATCAGGGTGTTGACCT	RPL23A
GAAGCTGTATGACATTGATG	RPL23A
GATGGCGCCGAAAGCGAAGA	RPL23A
TAAAGCTGAAGCCAAAGCGA	RPL23A
AAGTTATCCGGCAGCGAAAC	MRPL24
CATGGTTCCCCGGTAATCCA	MRPL24
CGACCACCCAGTTTCGCTGC	MRPL24
CGTAGCGCCTCCCGTGTCCG	RPL24
CGTTGAGCCTTTCTAACTTC	RPL24
CTCTCACCAATCCACGTTTC	MRPL24
GCCGAGCAGTCAAATTCCAG	RPL24
GTACGAGTCTCCACACGATC	MRPL24
TACAAGATCTACCCCGGACA	RPL24
TAGGATCCACAAGTTTGACC	MRPL24
TCTTAATGCGAAATGCGAGT	RPL24
ACCGAAGCAAGAATCGCAAA	RPL26
CCTGAACTTCATCATCCTTT	RPL26
GTTGTACGTGGACACTATAA	RPL26
TGCTGGGGTGAATGCCTACG	RPL26
TTATTCCTGCATCTTCTCAA	RPL26
TTCTGCAGGTGGTTATCACT	RPL26
AAAGCCAAGTCTCGACAAGT	RPL26L1
CCCAACAGGTGGTTATCACC	RPL26L1
CCTGGACCTCGTCGTCCTTG	RPL26L1
GTAGTTCGAGGACACTACAA	RPL26L1
GTTCAATCCCTTCGTTACCT	RPL26L1
TGCTTGGGTGAATGCCCACG	RPL26L1
ACGCAAAGCTGTCATCGTGA	RPL27
ATGCTCACCTTGTGGGCATT	RPL27
CAACACAGCGCCATTTCCGC	MRPL27
CACGATGACAGCTTTGCGTC	RPL27
CGTAGACCTCCTTAGTGTAG	MRPL27
CTCATTTAGAACATTGATGA	RPL27
GATCGAAAGCATGGCGTCGG	MRPL27
GCATCTAAAACCGCAGTTTC	RPL27
GGAGCTACCACCCGACTTCT	MRPL27
GGGGATAGTCCGCTACACTA	MRPL27
TTCCCTTCTAGATACAAGAC	RPL27
ACTATTTGTCGAAGTTGATC	RPL27A
CCTAGCCACCCAGGCTACTT	RPL27A
CTAGGGCTACTACAAAGTTC	RPL27A
CTTAGGGGCCACGTGAGCCA	RPL27A
GGCACTTACCTATGCGGCCG	RPL27A
TTCACGATGACAGGCTGCTT	RPL27A
ACCCCTGTTCAAGATCTATG	MRPL28
AGCCTGCCACCTCCTATGTG	RPL28
CACCACGACACCTTTGCCGT	RPL28
CACCTTGTACTTGTCGTAGA	MRPL28
CCAGCTCACCATGCGCAGGT	RPL28
CCATCCCAAACTTGGAGCAC	MRPL28
CCGCCACATAGATCTTGAAC	MRPL28
CGCAATTCCTTCCGCTACAA	RPL28
GACCTCATCGATGAGGCTTA	MRPL28
GCCCATAAGCCTCATCGATG	MRPL28
GCCCCCAGGCAGCCATCCGC	RPL28
GCGCAGCCAGAAGCCTGTGA	RPL28
AAACTTACACTGGTTGTGTG	RPL29
ACGTACCCAGGCCCCTACAA	RPL29
AGGTGGACCCCAAGTTCCTG	RPL29
GAGATTCGTATCTTTGTGAT	RPL29
GCCCGAAAATGGCACAGAAA	RPL29
GTACGTTTGGGAGCCTGAGC	RPL29
AAATAATCACCTGGTTCCCA	MRPL3
AAGTTCTCCGCTCCCAGACA	RPL3
ACATCAGTGATGAATGCAAG	RPL3
CAAGGATGGTCAAAAGCATG	MRPL3
CATTGTAGAGACACCACCCA	RPL3
CCGTGTCATTGCCCACACCC	RPL3
CCTATACATCCTTGGGAACC	MRPL3
CCTGGGTGTGGGCAATGACA	RPL3
CGAAAGTGAGCAGCATAAAG	MRPL3
TATGCTGCTCACTTTCGTCC	MRPL3
TCATGCCAGCCTTGTATCCC	RPL3
TTGCCAGGTTCCTTTAGAGT	MRPL3
AACACGTGCCTCAAAAGCAC	MRPL30
AAGTAGTTAAGCATTTGATA	MRPL30
AATAGAGTACTATGCTATGT	RPL30
AGTCTCTTATTTGTACAGAT	MRPL30
CTCACTCACCGTCTTCTTTG	RPL30
GATATTCTTGTGAACTTGAG	MRPL30
GATGGTGGCCGCAAAGAAGA	RPL30
GTACAAGAAGACGTCCATAT	MRPL30
TATTATTGCCACTGTAGTGA	RPL30
TCTTCGATTACCTCAAAGCT	RPL30
TGCTTTGTAGAAAAAGTCGC	RPL30
TTAGACATGTTCTCCTCTGC	MRPL30
ACCAAAGTATATAGCTTATT	RPL31
ACTTTAGCACCTTATTCCTT	RPL31
AGATCTACAGACAGTCAATG	RPL31
GCTTCAAGAAGCGTGCACCT	RPL31
GGGCTCCCTTTATGGGCTCT	RPL31
TGCCATACCGAATCCGTGTG	RPL31
AGACCGATATGTCAAAATTA	RPL32
AGAGAACCAAGAAGTTCATC	RPL32
ATAGACGTTTGTCCTGAATG	MRPL32
ATTTCCTTCAGCGTAACTGG	RPL32
CAAGAACCGCAAAGCCATCG	RPL32
GACGCACCATTGAAGTTAAC	MRPL32
GAGACAGAAAGCGACCATCC	MRPL32
GCGCAGTGAAGAAAATGAGT	RPL32
GGTGGTTTCGCCGTGGTCTG	MRPL32
GTTGCTTCCATAACCAATGT	RPL32
TCCAAAAGATACTGTCCAAA	MRPL32
TTACCTACCCCACGGAGGAC	MRPL32
AAACAAAGAAACATGTCAGC	RPL34
ACGAACACATTTAGCACACA	RPL34
AGCGTTTGACATACCGACGT	RPL34
CAACGCTGCCGACCTACTCG	MRPL34
CATCCTTCGCCGAATGCTCA	MRPL34
CCCTGTTGGGCCCCACGAGT	MRPL34
CGCAAGTCGCTGAGCCATTG	MRPL34
CTTACCCCTCGAAGTCTGCC	RPL34
CTTTCTAGGTCCCGAACCCC	RPL34
GCGAAGGATGACCTGCACGC	MRPL34
GGTCCGGCGCCTGAGCACGC	MRPL34
TATTGTAGGAAAGCCTACGT	RPL34
AGACACGTGCCATGCGCCGC	RPL35
CAATGGATTTCCGGACGACT	RPL35
CACTTACATCTTAGAGAGCT	RPL35
CCAGTTTCGCCTCTTCCAGA	MRPL35
CCGTGAAAGCTGTCATCGAT	MRPL35
CCTACGGCCCCTGAATATTT	MRPL35
CCTATCGATGACAGCTTTCA	MRPL35
CGCATGGCACGTGTCTTCTT	RPL35
CTACCTATTAAGGATCACTG	MRPL35
CTCAATCGCTTCTTCCTTGC	MRPL35
TCACCTTGTAGAATTTCCTG	RPL35
TTGCGCGCAGGCCAAGATCA	RPL35
AATAGAATTCTGTTTCATCT	RPL35A
CATTGGACACAGAATCCGAG	RPL35A
GGAAAAGTAACTCGGGCCCA	RPL35A
GTGTCTTAGGCTGTGGTCCA	RPL35A
TAAAAGGAACTATGTCTGGA	RPL35A
TGCAGATGCTGTACCCCTCA	RPL35A
AAGTGAGCGCACTGCTGCCC	MRPL36
AATCATGTCCCGCACGAACT	RPL36
ACCGACCCCGCCTCTTCACC	MRPL36
CATTCGAGGTGCAGCCCCCG	MRPL36
CCACGGCCATAGGGTAGCGT	RPL36
CCCGTACGAGCGGCGCGCCA	RPL36
CCGCACTCACCCCGCGGCGT	RPL36
GCCCCATCTGCTGCCTGCGC	MRPL36
GCTCTATCTCAGTCGTCACA	MRPL36
GGACGCACATCCGCGCCAAG	RPL36
GGGAGGGGCTCAGTCTTTCT	RPL36
TGACGACTGAGATAGAGCAG	MRPL36
ACACTTAGAACTGGATCACT	RPL36A
CAGGAAAGCGGCGTTATGAC	RPL36A
CATTCTCTTAGATCTGCAGT	RPL36A
TCTTGTACTGTGTCACTTTA	RPL36A
TTAACGTCCCTAAAACCCGC	RPL36A
AAGTTTAGAACTGGATCACT	RPL36AL
AGAACCTTCTGTAAGAAGTG	RPL36AL
CAAAGTGACACAGTATAAGA	RPL36AL
CAAGGATTCTTTGTATGCCC	RPL36AL
GATCATAGCGCCTCCTTCCC	RPL36AL
TTAGCCTTCTTCCGGAAAAT	RPL36AL
AAGGCGGTGTGGTCGTAAAT	MRPL37
ACGAAGGGAACGTCATCGTT	RPL37
AGACGAAATACCACCGGAAC	RPL37
CACACGTTGTGCCGCCGCTG	RPL37
CATTCAGAACGCACTCGTCT	MRPL37
GTCTTCAAGCCCGGTCATCG	MRPL37
TCCCCATACCCTGTACTTAC	MRPL37
TGATCTCTCACGCCCGTCTC	MRPL37
TGCAGGCATGGATTCCGTGA	RPL37
TTGACATTCTTAAGATGAAC	RPL37
TTTAGATAACTGGAGTGCCA	RPL37
ACAGAAAGAGCAAGTGTACT	RPL37A
CAGTACCACTTCCGCTGTCA	RPL37A
CTAGACTCACTTGTACGTCC	RPL37A
CTTTACCGTGACAGCGGAAG	RPL37A
GCCAAACGTACCAAGAAAGT	RPL37A
ACAGCTACTGGAACGGAAAC	MRPL38
ACCGGAGCTTCGACCGCTAC	MRPL38
AGTGAGTAGCAACGTCCACA	MRPL38
CACGGCATCCAGCGGGACAC	MRPL38
CAGCAGATACCTTTACACCC	RPL38
CCCTCTAGGTTTGGCAGTGA	RPL38
CCTGCTCACAGCCCGACGAA	RPL38
CGGACCTACCGAGAGTATTT	MRPL38
GTTGCAGCCTCGGAAAATTG	RPL38
TACATTTGGCATCCTTTCGT	RPL38
TGGCACCGTGGAACAGGTCT	MRPL38
AAAATCGTCCCATTCCCCAG	RPL39
AATTCCTTATAGACCCAGCT	RPL39
AATTTCTAGATTTAAGCGAG	MRPL39
ACAGCCCATCATCATAGCAC	MRPL39
ACATTGGAGAAGAACCAAGC	RPL39
ACTCCATTTGATCCCGCCAC	MRPL39
AGTCTTCTCACAAGACTTTC	RPL39
ATTCATCACGAAGACAGTAC	MRPL39
CTCTGGCTGGTCGCACCCGG	MRPL39
CTTACGCATGGCACAACTGT	MRPL39
TGAAAACTGGAAATAAAATC	RPL39
TGTGTAGGTACAACTCCAAA	RPL39
AAGCCCAGGTGTCCGTGCCG	RPL3L
ACCGGGGCAAGGTGAAGACG	RPL3L
TCGGGTCATTGTCCACACTC	RPL3L
TGTAGAAACGCCGCCCCTAG	RPL3L
TGTGTCCCGCCACCTCTTGC	RPL3L
TTGAAGCTCCGGAGACCTCG	RPL3L
ACTTTATCTTCAACTACCAA	RPL4
AGCGCGTGCGACCGAGAACC	MRPL4
ATACGTTTCCAAAAGCACCC	RPL4
ATCAGACTAGTGCTGAGTCT	RPL4
CACGCGCTGCCTCTTCCGCC	MRPL4
CTGTTACCTCCTCGCCAGAG	MRPL4
GAAAAATAGATGTGTCGTGG	RPL4
GAGCTCGACTTTGCGCAGCA	MRPL4
GCAGCATCCGCTCTCCGCTC	MRPL4
GCTGCGCAAAGTCGAGCTCC	MRPL4
GTGTGCTCGCCCACTGATAT	RPL4
TTTGTTAGGTCATCGTATTG	RPL4
ACCGCTCACCTTGGCTCTCA	RPL41
AGATCCGGGACGACGAACTC	MRPL41
AGCGCAAAAGAAGAAAGATG	RPL41
AGGGGCGTCTCCTCGCTCTC	MRPL41
CAGCGGCGCGCTGCCTGGTC	MRPL41
GCAGCTCTTCAGCGAAGCCG	MRPL41
GGAGGAAGAAGCGAATGCGC	RPL41
GTACGGCTTCGAGCCCACAC	MRPL41
AAACAGAGATATCATTTGTC	RPL5
ACGAACTATCATCCTGTATT	RPL5
ATACCCTGCGGGCCAGCAGC	RPL5
GATTGCTTATGCCCGTATAG	RPL5
GTCGTCTTCTAAATTTCACT	RPL5
GTGAAATTTAGAAGACGACG	RPL5
AAGTGGCAATGACAAATTTC	RPL6
CCTCGAAAGCTGTTGAGCCA	RPL6
GATCTTCGACACAGAAAAAG	RPL6
GCAACTGTTACAAAACCAGT	RPL6
GTACTCTCACCTTGCCCCTG	RPL6
GTAGGTTGAAAAGAAAAAGA	RPL6
AAAGAAGTTTGCCCAAAAGA	RPL7
ACTTACCCCCATGCAATATA	RPL7
CGTTTGTCATCAGAATCAGA	RPL7
TAACGTTAGAGAGAAGAAGA	RPL7
TATCAATGGAGTGAGCCCAA	RPL7
TCTGATGACAAACGCCAATT	RPL7
ACACGACGTGGATCCCATCG	RPL7A
CCTCACCTGTTTGGCGGTCC	RPL7A
CGGGCCGAGAAGAAGGCTGC	RPL7A
TACTCACCTGCTCGAAGGAC	RPL7A
TGCCCAGCCGAAAGGAAAGA	RPL7A
TTACCAATGCCAAAATTCTT	RPL7A
ATCCGCAGAGATGCCCCTGC	RPL8
CAGCACACGATTGTACCCTC	RPL8
CAGCCTGTGGAGCATCCTTT	RPL8
CTTGCAGCCCAGCTCAACAT	RPL8
GTCCGCTTCTTAAACCGATA	RPL8
TGGTCTTCCGGGATCCGTAT	RPL8
AAAAATATATCCGCAGGGTT	RPL9
AGGGCTTCCGTTACAAGATG	RPL9
ATTAGAGAAGATCCAGACCA	MRPL9
ATTGAGCTTGTTTCAAATTC	RPL9
ATTTCTAAAAAGCTGTCGCC	MRPL9
CCGGAATCGACTCCTTCCTC	MRPL9
GCATATACAGCCAGTCCCTG	MRPL9
GCTCATCCTGACGCAGTCGG	MRPL9
GCTTATAGACGCGATGTCGC	MRPL9
GTTATCGTGAAGGGCCCCAG	RPL9
TACAGCTCCGGGTTGACAAA	RPL9
TCTAGTCGACATTACTCTGA	RPL9
GCACCACAGCCTTCCCGCGA	RPLP0
GCAGACTGCTGCCTCATATC	RPLP0
GGAACTGACTTCTCCAGAGC	RPLP0
TCCACTCACCAGGATTTCAA	RPLP0
TGAAGTGCTTGATATCACAG	RPLP0
TGCCATTGTCGAACACCTGC	RPLP0
AAAAGGCTCAACATTTACAC	RPLP1
CCCTCCACTGCTGCTGCTCC	RPLP1
CCTACCTGGAGCAGCAGCAG	RPLP1
CCTCATCGTCGTGCAGAATG	RPLP1
CTTACCTTTGCAAACAAGCC	RPLP1
TCTAGCTGAGGAGAAGAAAG	RPLP1
ACGGCTACAGCCCCACCAGC	RPLP2
CATTGAAGACGTCATTGCCC	RPLP2
CCACCACTTACCTGCAGCAG	RPLP2
CGGCCGCTACCTTGTTGAGC	RPLP2
GAGCAGGAATTTAATCAAAA	RPLP2
GTATCGAGGCGGACGACGAC	RPLP2
AACACTTTACAGATGTTTAG	MRPS10
ATTTCAGACATGAACCTCCA	MRPS10
CAGCGTTCGGTGCTGTGTGC	MRPS10
CCAGTACCTGCCAGAGGCGC	MRPS10
CGACCTGCGAGACTCACAAG	RPS10
CTCTTACAGAGAGGCGGATT	RPS10
GATACTCACAAACTGGAATT	RPS10
GGAACCATACCTTTAGGCCG	RPS10
GGACCGGCAAGATGGCGGCG	MRPS10
TCTTGTAAATATGCACTGAT	MRPS10
TGGCACAGCACTCCGTCTGT	RPS10
TTACAGTCTCTCAAGTCCCG	RPS10
ACTGCGCTCACCTGAAGCAG	RPS11
AGTGCGCTTCAACGTGCTCA	RPS11
CATTACTAGCAGAGACTACC	MRPS11
CCGATGTTCTTGTAGTACCG	RPS11
CCGCGGTACTACAAGAACAT	RPS11
CGTGATCCACATCCGAGTTG	MRPS11
CTCCACAGGGACGTCCAGAT	RPS11
CTGTAACTTACCAAGCGTCC	MRPS11
TCGACAGCTCCAAGACGCTG	MRPS11
TGCGATGCCTGTGCCCTTCT	MRPS11
TGTAGTGCAGATAGTCTCGG	RPS11
AGTTGGGCTTCTTCGGCTTG	MRPS12
ATCGCAAGTGCTGTCGAGTG	MRPS12
CACGTACTTGTCTAAGGCTT	RPS12
CACTCGACAGCACTTGCGAT	MRPS12
CCCACCGCCATGGCCGAGGA	RPS12
CCCCCACTTACCACAAGTTA	MRPS12
CTCAACACGTCCCTAACTTG	MRPS12
GTCAAGCTCACCGTTGTGCG	MRPS12
TCGCGTTTAAGCATTGCTGC	RPS12
TTACCTTAATTAGGTTGATT	RPS12
AAACACTCACCGATCTGTGA	RPS13
AGTGGGGACGCTGCGTCGAT	RPS13
CAACACCATGTGAATCTCTC	RPS13
GTAATCCTGAGAGATTCACA	RPS13
GTCTGATTCTAATAGAGAGC	RPS13
TGATACTTACTATTTCCAAT	RPS13
ACTAGGACATGTCCAGCAGC	RPS15
CACACACCTTGATCTCCACC	RPS15
CCGACCAACTTCGAGCCTCC	MRPS15
CCGCGCGCGGATATGTCGTC	MRPS15
CCGGACGACATATCCGCGCG	MRPS15
CGTGAAAAGACTCTTGTCTT	MRPS15
CGTGGACCTCGACCAGCTGC	RPS15
CTCCCGCAGCCCGAGATGAT	RPS15
CTTCAACCAGGTGGAGATCA	RPS15
GCCGGGCCGGCCATGCTTTA	RPS15
GGTCATCATCCAGCCTAGAC	MRPS15
GTAGTCTTTGAGCAGCGTAG	MRPS15
AATGGTGCGCATGAATGTCC	RPS15A
ATCATTGATGACCACAGAGC	RPS15A
CCTTGTTTAGCCTGCCTGTG	RPS15A
GGCCAACTTACCCAAACTGG	RPS15A
TACTCTTGAGAGCATCTGCC	RPS15A
TGACGTGCAACTCAAAGACC	RPS15A
ACCTTGTACTGTAGCGTGCG	RPS16
CAAATGCTGAGAGACTGCGA	MRPS16
CTGGGACTCACCATAAATCT	RPS16
CTTCTTGCCAGATGTGGATG	RPS16
GACGAGGGTCAGCTACCAGC	RPS16
GCCGCGCACGCTACAGTACA	RPS16
GGTCACGTGGCCCAGATTTA	RPS16
TACAGCTACTCTCCTCTGCA	MRPS16
TCAGCATTTGTGATCATCAT	MRPS16
TCGGCCGTTCTACCGCATTG	MRPS16
TCGTTGCCCTCAACCTAGAC	MRPS16
TGACTCACTGAGGTGGACCA	MRPS16
ATGGACGGATGAGCGAACTA	MRPS17
CACCTTCCCCACAATCCATC	MRPS17
CCGAACTCAACGGACTCTCC	MRPS17
CTCACCCTGCTATCTTGTTG	RPS17
CTCCTCCTCCTGCAGCTTGA	RPS17
CTGATGAAGCGAATTCAGAG	RPS17
CTGTGCTGGAACTACCTACC	MRPS17
GCTCATCCGTCCATGCCAGA	MRPS17
TCGCACCAAAACCGTGAAGA	RPS17
TCTGGATCCCTATTTATTAA	MRPS17
TTCAGCATTTCCTTAGTGTC	RPS17
TTCCTTGTAGGTCTCAGCCT	RPS17
ACTTACCTTAATGGCAGTGA	RPS18
AGTGAGTTCTCCCGCCCTCT	RPS18
GGGCCGAAGATATGCTCATG	RPS18
TGAATCCAGGTCCTAGCCAA	RPS18
TGTCTGTTCAAGAACCAGTC	RPS18
TTTCCGCCGCCCATCGATGT	RPS18
CGGCCGCAAACTGACACCTC	RPS19
CTGACGTCCCCCATAGATCT	RPS19
GTAGAACCAGTTCTCATCGT	RPS19
TACCCCCAGCTTCCACAGCG	RPS19
TCCAGATCTCTTTGTCCCTG	RPS19
TGTAAAAGACGTGAACCAGC	RPS19
ACCACCTACCGAAGTTGCCC	RPS2
ATACGCCCGACAAGATAAAA	PRPS2
CCAATATGCTGTCGGTGGCT	PRPS2
CGACGCGTACCTTAATAGGC	RPS2
CTGCGTACTTGTCCGCAGCA	PRPS2
GCTCACCCGCGCCGAGTATT	MRPS2
GCTGCCCCGAATACTCGGCG	MRPS2
GGACCACGACATCATCGACC	MRPS2
GGATGATGACGCAATCTTGC	PRPS2
GGCCCTTATGATCCGCGAGT	MRPS2
GTACCTTGAACCTGGTGCGC	RPS2
TCCGCATACAAATTATCCAC	PRPS2
TCGCAGGCATTTGTTGCTAT	RPS2
TCTCTTCTCCCTGCCTATTA	RPS2
TTCGGGAAAACATTGCCGAG	PRPS2
TTCTCGGGAAGGCGACCCCC	MRPS2
AAAAACACCCGTGGAGCCGG	RPS20
AAGCCGCAACGTAAAATCCT	RPS20
ACCAGTTCGAATGCCTACCA	RPS20
ACCTTGGTAGGCATTCGAAC	RPS20
CACTTCTCAAAGTGTACTGC	RPS20
GAGAAGTGTATTCGAATCCC	RPS20
AACACTCACCATCCTACGAA	RPS21
ACCGATGATGCGATTGCTAG	RPS21
AGATGATTCCATTCTCCGAT	RPS21
ATTATGAGAAGCCATGCCGC	MRPS21
CAATGAGCCCATCCATAGTG	MRPS21
GATGGTACAGGAAGGGAACG	MRPS21
TCACCTCGGCCACGTTCATC	RPS21
TTACTTTGAGACGATGCCAT	RPS21
TTCTAGGTTGACAAGGTCAC	RPS21
TTTATACAGAATCCTCACTA	MRPS21
TTTCCATGTTGTAGATCCGC	MRPS21
AAAGTTCAAGCAACCGTCAT	RPS23
ACAGCCTTTGTACCCAATGA	RPS23
ACCATTAATATTTATGATCT	RPS23
ACGCTCTAATCCGATCCTCG	MRPS23
ACTGTTTATCATGCCACTTC	RPS23
ACTTCAAGTCTACCTGTCAA	MRPS23
CAAAGGCCTCGAGTGCGATA	MRPS23
CCAGGAAAATGATGAAGTTC	RPS23
GAGGCAAGAGACCTTTCGAC	MRPS23
GTCACCGACGAGACCAGAAG	RPS23
TAAGACGAGTAGGCGAAGCA	MRPS23
TGTCAGACCACAGACTGCGT	MRPS23
AAAGCGCCGGGGTAACCAGT	MRPS24
ATCAGAGAGACGAACAGCTG	URGCP-MRPS24
ATGGCGGCCTCCGTGTGCAG	MRPS24
CACCTCCCCGGTCTGCGCCA	URGCP-MRPS24
CCCCCTTGCTTACGCGTACT	MRPS24
CTGTCGCCTTCCCGGGGTGA	RPS24
GACCTCAAGAAAGCAACGAA	RPS24
GATGATTGCGAGTTCCGTTA	URGCP-MRPS24
GGACCATGCCGCAGAGCGAA	MRPS24
GGCCCGAGTACGCGTAAGCA	MRPS24
GTGCTCACCTTGGCGCAGAC	MRPS24
GTGCTCACCTTGGCGCAGAC	URGCP-MRPS24
TACTCTTGCAAGTCTATGTT	RPS24
TGACCAACCGACTACTTCAG	RPS24
TTCCATAGATGGTACAAATG	URGCP-MRPS24
TTCCTTTCGTTGCTTTCTTG	RPS24
TTGTTTCAGGCATTCAGATT	URGCP-MRPS24
TTTGTTTCCTCTGAAGTAGT	RPS24
ACTCACCTAAGTAGAATCGC	MRPS25
CAGCCTGGTGCCATTACCCA	MRPS25
CATGCATCTTCACCAGCAGC	RPS25
CCCCCTAGGACTTATCAAAC	RPS25
CCCTTCCTGCGATTCTACTT	MRPS25
CGCTCTGAAAGCCGATGCCC	MRPS25
CGTTGCCGCCATGCCCATGA	MRPS25
GGTGAGCAGAAGTGGTCCAA	RPS25
GGTGTTCAAGGACTCCGTGA	MRPS25
TAAGGACGACAAGAAGAAGA	RPS25
TTCCTTACAGAGTTTATCAT	RPS25
TTCTTCTTCTTGTCGTCCTT	RPS25
AAGGTGCACGAGGCCCGAGC	MRPS26
ACTCCCGGAAGAACTACAAC	MRPS26
CAATTCACAGCAAAGTAGTC	RPS26
CAGGATGGAGTTCGTGTCCG	MRPS26
CATGTTCACTCGCTCGATCT	MRPS26
CCCCCACCAAAGCCCATGTA	RPS26
GCGAGTGAACATGCCGCCCG	MRPS26
GGCGTTGGAGCAGGCCCGCA	MRPS26
TACTCACCGCAGGTCTAAAT	RPS26
TCAGCTCCTTACATGGGCTT	RPS26
TCTGAAGCGAGCGTCTTCGA	RPS26
TGTCGCAGACAAAGAAAAGA	RPS26
AAATTGAATGTAAAGTTATC	MRPS27
ACAAAACTACCGTTTGTGCA	RPS27
AGCTGATCTTGCATCTTTAA	MRPS27
AGGATGCTATAAAATCACCA	RPS27
CCTTCATCCCTCTCCAGAAG	RPS27
CTTTACATTCAATTTACTGA	MRPS27
GATATTGTTAAAGAACTAAC	MRPS27
GCATTTCACATCCATGAAGT	RPS27
TCTGCTAGATGCTTTATCTG	MRPS27
TGAAGTCTGTCTTCTTTGCC	MRPS27
TTAGTGCTGCTTCCTCCTGA	RPS27
TTCCTCCAGGATGTTCCTTC	RPS27
AAGATCAGTCTCTGCTGATC	RPS27A
ACACTCATAGGTTGAACCCT	RPS27A
ACTACTTGCCTTCCTTATCC	RPS27A
CAGCAGAGACTGATCTTTGC	RPS27A
GGCCCGTACCTCGAGGGTGA	RPS27A
GGCTCACCTTATAATATTTC	RPS27A
AAGTCCAAATTCTTACTTTA	RPS27L
ACATCCATAAAGTAAGAATT	RPS27L
AGATTTACTACATCCGTCCT	RPS27L
AGGTTGCTACAAGATCACCA	RPS27L
GGAAAGGCCAGACTCACAGA	RPS27L
TGATATACCTTCTGTGAGTC	RPS27L
AAACCGCCTGCGCGCGTCTT	MRPS28
AGGCGGTTTCGCGAGCGCGT	MRPS28
CAAGATCTAATAGCCGCAAC	MRPS28
CCTCCAGGTCACCAAGGTCC	RPS28
CGTGCACTGTCCCTGAGAAC	RPS28
CTCACCCTGGCCAGCTTGAT	RPS28
GCCAAGCTCAGCGCAACCTC	RPS28
GTAGGTGCGCGTGGAATTCA	RPS28
TAGATCTTGAACTTACGTCT	MRPS28
TGTATGTAGAAGACCAGAAG	MRPS28
TTAGGGTTCTCCAAAAAATG	MRPS28
ACAGTCGTGTCTGTTCAAAC	RPS29
AGTGCCAAGGAAGACAGCTC	RPS29
CGATATCCTTCGCGTACTGA	RPS29
CTCACCAAGAGCGAGAACCC	RPS29
GAGATGGGTGTCACCTCCAT	RPS29
TGGGTCACCAGCAGCTGTAC	RPS29
AAATCATTATCTTAGCCACC	RPS3
CACCACAACCTCGCAGCCTT	RPS3
CTCACCTCTACACTGCCCTC	RPS3
CTTTCCAGAGGGCAGTGTAG	RPS3
GGCCAAAGGCTGCGAGGTTG	RPS3
TTGGATTAGTTTGTCGCTGA	RPS3
AAGCTACTTACTGGTTCCTT	RPS3A
CACGGGTAAGATCCATGCCA	RPS3A
TGCAGGATTCCAGACAGCAT	RPS3A
TTCTCACTTACATTCAAACT	RPS3A
TTTCTTATATTGAACATAGC	RPS3A
TTTGTAGAAATTGCATCTGA	RPS3A
CACCCGCTTCAGATGCTTCT	RPS4X
CAGGCTCCTCGTCCATCCAC	RPS4X
CATACTTAAGTCTGTTCCTC	RPS4X
GTCCCAAGAAGCATCTGAAG	RPS4X
TTATCCAGCATCCAATGCTT	RPS4X
TTCTTACCCATGAATCCAGC	RPS4X
AACACGCTTTAAGTGCTTCT	RPS4Y1
AGACTCAAGTATGCGTTGAC	RPS4Y1
CAACGTTTCATCAAAATTGA	RPS4Y1
GTGGATGTCACATACCCTGC	RPS4Y1
TTCCTCTGATCGTCTTCCTC	RPS4Y1
TTGTCAAGCATCCAATGCTT	RPS4Y1
AACACTCTTCCATGCCAAAA	MRPS5
AAGCTGCTGGTAAGGTGTTT	MRPS5
ATCGTTCTATATAATGCAAA	MRPS5
CCAATTTGCAGGTCATTTAT	MRPS5
CCAGGCTCACCTGGTTCACA	RPS5
CCCCCTGCGCCGTGTGAACC	RPS5
CCTGTCCCAGGATGACCGAG	RPS5
GCATACCGCCCTGCACTGTG	RPS5
GCCCTACCTCGCCTGTGAGC	RPS5
TGAGCTCATCAATGCTGCCA	RPS5
TGGAAGAGTGTTCTCGGCAA	MRPS5
AAATCTGAGCGTTCTCAACT	RPS6
AGGCATGCCCCGCTACGAGC	MRPS6
ATTAAAGCCAGCTCGTAGCG	MRPS6
CACCGCAGCTGTTGAAAGCA	MRPS6
CCTCCTACCTTCTTTATTTA	RPS6
CGAGATATAGATGTGATTAG	MRPS6
GTGAACGAGCGCTTCCTTAT	MRPS6
TACGCCGCCGTTTGTGCTGC	RPS6
TACTACAGTGCCTCGCCGCC	RPS6
TACTTTCTATGAGAAGCGTA	RPS6
TACTTTGAAACGTACGATAG	MRPS6
TAGACTAACCTTCATTCTCT	RPS6
AAAATAAGCAAAAGCGTCCC	RPS7
ATGGGTACCAGCCCAATCAT	MRPS7
CCAAATGAACCTTTATGAGC	RPS7
CCGCTATAGTCCTGAATTCA	MRPS7
GCATGTCGTCTTTATCGCTC	RPS7
GCTCCCTGAGCTGAGCCTTG	RPS7
GGAATATTATCGCAAGCCAG	MRPS7
GGTGTAGGGGTTGCGTTCGA	MRPS7
TCCCTGTACCCCTACCCGAC	MRPS7
TTCTTAGGCTCTTCTGGAGC	RPS7
TTTCTTTAGGAAATTGAAGT	RPS7
AATTCCCCACGTCCAACCTC	RPS8
CAGGTTGTACTCGTAAAACA	RPS8
CCGCAAGAAGGGAGCCAAGC	RPS8
GCGCCCAGCTGCCAACACCA	RPS8
TGGCACAAGCGCCGCAAAAC	RPS8
TTCCAGCAGGGCAAGCTTCT	RPS8
ACAAACTTACCTCTTTGTCT	MRPS9
CACCAGGCGAGTATGGGCTC	RPS9
CCCGGGCGGCCACCCCCGTA	RPS9
GCACCTTCGAACAGACGCCG	RPS9
GGTGGTACCTGATATGGCGC	RPS9
GTATAGAAGAGATAGTGAAA	MRPS9
TCCCAGAAAAAACTGTAACC	MRPS9
TGATCCGCCAGCGCCATATC	RPS9
TTCTTCCAGGGTCCGCAAGC	RPS9
TTTCACTATCTCTTCTATAC	MRPS9
ACAAACCTGGCCAGTATTCC	RPSA
ATCATTACCTTGTTGTTGCA	RPSA
CCAGTAGGGAATTGCTGAAT	RPSA
CCTATTCAGCAATTCCCTAC	RPSA
TTGGCAGGGAGCTCACTCAG	RPSA
AAGCTAAATTTATAATGAAC	RSL24D1
ACGAACATCATGCCGTGTCC	RSL24D1
AGCGCAATCCTCGCAAAGTT	RSL24D1
GCCTTACCTTGCAATCGTTG	RSL24D1
GCTCTTTACCAGCTGCTTTC	RSL24D1
TCAAATACCAGCGAGAGCTA	RSL24D1
ACCCTCCTTGTCTTGAATTT	UBA52
AGTTGACAGCACGAGGGTGA	UBA52
CAACCTGCGTCCCAAGAAGA	UBA52
CGGCAAATATCAGACGCTGC	UBA52
TCAGACTACAACATCCAGAA	UBA52
TGCAGAGTCCACCCTGCACC	UBA52
CGAAAAGCTGACTAATTATT	IFNG
CTGTCGCCAGCAGCTAAAAC	IFNG
GACATTCATGTCTTCCTTGA	IFNG
GTTCATGTATTGCTTTGCGT	IFNG
TGCAGGTCATTCAGATGTAG	IFNG
TTCTCTTGGCTGTTACTGCC	IFNG
ATCAAAAACTCATGCAGTTT	PSMA1
ATGACAATGATGTCACTGTT	PSMA1
CCGCAATTGAGATACCAATA	PSMA1
CTCCATGTTGACAACCATAT	PSMA1
CTGCTGATGCTAGACTGTTA	PSMA1
TCATCAAATTGAATATGCAA	PSMA1
ACCCATTCCTACAGCTCAGC	PSMA2
AGCTGGAGGAGCCCCGTCCG	PSMA2
ATTAGGGAGCTTACTTTGCC	PSMA2
CTCTGTACCAGCTGAGCTGT	PSMA2
TCCCATTGCTGTAGCTTTCC	PSMA2
ACTTGAAAAACTCTTCCGTC	PSMA3
ATAGCATCTTGCAGACAGAG	PSMA3
GCCAAAGTTAGATCTGAAGT	PSMA3
TACAGTGCTGTTAGACCTTT	PSMA3
TCAAGTTGAATATGCTATGA	PSMA3
TCCAACTTCAGATCTAACTT	PSMA3
ACCTTCTGGAGAAAATATAG	PSMA4
AGTCTCGAAGATATGACTCC	PSMA4
CATCCCCCGTAATTTCCACT	PSMA4
GCTATTATTTCCAATGCATG	PSMA4
GTTAAAGGAAAACGTCCCTT	PSMA4
TTTCATTGCTGTACATTGGC	PSMA4
ATCACACTCACCATGGCACC	PSMA5
ATCAGCAATTAGCCCACTCA	PSMA5
CTATACCTTGATAGCCTCAA	PSMA5
GACCCAAGCTGTGTCCAATC	PSMA5
GTAGAGATTGATGCTCACAT	PSMA5
TCAAGTGGAATATGCCATTG	PSMA5
AACCCACAGTAGTAACCTGC	PSMA6
AGATTAATTACCTGTCATTC	PSMA6
ATAAGCTGACAGCAGATCCC	PSMA6
GCATACTTACAACAACCAAG	PSMA6
TGTGTGATGACCGGAATGAC	PSMA6
TTGTTTAACTCCCGCTGCAG	PSMA6
CAAAGTCGAAACCCACGATG	PSMA7
CAAGTCAGTGCGCGAGTTCC	PSMA7
CAGGCCTCACCGCCGATGCA	PSMA7
CGTCAGTATAGTTCTTCTCC	PSMA7
GTTGATGACTATCCTTGCAT	PSMA7
TCGACTTTGATGGCACTCCT	PSMA7
ACTTGAAAAAGGTGTCCGTC	PSMA8
ACTTGACAGGTCGGAATTCG	PSMA8
ATCATCAAAACCTACAATTA	PSMA8
CAAGCATGATAAGTACCAGA	PSMA8
CGATGGCGTCTCGATATGAC	PSMA8
GGTGAAGAAAGGATCCACCG	PSMA8
AGCAATTGCCCCCGTAGTCA	PSMB1
AGTACTATACTGGCAATTGC	PSMB1
GATTATTGAAGCAAGACTAA	PSMB1
GCGAAAATCGCAGCTGCAAA	PSMB1
TCTGATACTCGATTGAGTGA	PSMB1
TTACCCTCCGTTGAAAACGT	PSMB1
CGCCACGACCGAATCGTTAG	PSMB10
GGAGCTACACGCGTTATCTA	PSMB10
GTCCCGGTCTTGCGTGCGTG	PSMB10
TAACGCGTGTAGCTCCATCT	PSMB10
TACGCGAGCCACTAACGATT	PSMB10
TCCCTCACGCACGCAAGACC	PSMB10
ACCCACCGTGATGCCTATTC	PSMB11
CTCTTCTACGTCTATAGCGA	PSMB11
TAACTCCACGTACAGCACAC	PSMB11
TCATGTCGTAGCGATAGCCA	PSMB11
TCGCTACGACATGAGCACCC	PSMB11
TCTAGCACGCCGTAGGCATA	PSMB11
CAACTTTATAAGATGCGAAA	PSMB2
TAACTTCACACGCCGAAACC	PSMB2
TAGTCCATGTAATACAGCGC	PSMB2
TGTGAAGTTAGCTGCTGCCG	PSMB2
TTTCAGCTATCTCACGTGAG	PSMB2
AAAGGTCTTCGGGTCCAACC	PSMB3
ACCTGCGCCGAACAAATGTA	PSMB3
ACCTTATACCCTCATGAGCA	PSMB3
CGGCCAGACCGATGTACAGC	PSMB3
CTCACCGTTTCTCATACAAG	PSMB3
TGACCGGCTGTACATCGGTC	PSMB3
AAGGGTTCATCTTCGAGCGC	PSMB4
AGTCCTCGGCGTTAAGTTCG	PSMB4
ATCGCCACTGTCACCGAAAA	PSMB4
TGCAGCGTTCTACTAAGTCG	PSMB4
CAAGTCCGAAAAACCCGCGC	PSMB5
CATGGCGCTTGCCAGCGTGT	PSMB5
CTTATCCCAGCCACAGATCA	PSMB5
CTTCACTGTCCACGTAGTAG	PSMB5
CTTTCCAGGCCTCTACTACG	PSMB5
TTTGTACTGATACACCATGT	PSMB5
CGATGATGATTCCCGCCATC	PSMB6
CGGGAATCATCATCGCAGGC	PSMB6
CGTGCAGTTTGACGGGGGCG	PSMB6
CTTACCATCATACCCCCCAT	PSMB6
GCGGACTCCAGAACAACCAC	PSMB6
TCCGGGAGCTCCTACATCTA	PSMB6
AAAACTGGCACGACCATCGC	PSMB7
CATCTGCTTCAGCATCCGAT	PSMB7
CCAGCTCATTTCTTCCAACC	PSMB7
CTTATAGACCACCCCAGCGA	PSMB7
GCAGATACAAGAGCAACTGA	PSMB7
TAATAGGATGGCATAGTTCT	PSMB7
AATCACCTTGTTCACCCGTA	PSMB8
AGCTGGGAGTAGTGTCACGC	PSMB8
AGGCTGTACTATCTGCGAAA	PSMB8
CCGGTACTGGCACATCATGT	PSMB8
GCATCCGCTGGAAACAGGGG	PSMB8
GTGCAGCAGACTGTCAGTAC	PSMB8
CAGTAGATGCGCTCGTGCAG	PSMB9
CGACATGGCCGCCTACCAGC	PSMB9
GGACCAACGTGAAGGAGGTC	PSMB9
GTGGATGCAGCATATAAGCC	PSMB9
TATCAGCTATAAATATCGAG	PSMB9
TCCGGCAGCACCTTTATCTA	PSMB9
AATTAAAGACTATCTTCTCA	PSMC1
CAGAGCATACCTGTGCCAGG	PSMC1
TCATCCTTCTTGCCACCTCC	PSMC1
TCCTGAATATTATGAAGAGA	PSMC1
TGACACCTCACACTCAGTGC	PSMC1
AAGAAAATTAATGAGCTCAC	PSMC2
ACCTGCATCATGGTAACTGT	PSMC2
AGGGTCAGAGCACTTACTCT	PSMC2
CGACTGTGTCCAAATAGCAC	PSMC2
TCTTCTTTCAGCTCTGGATG	PSMC2
TTCTACTTACCAGTGCTATT	PSMC2
ACGTACTTCCTTCCTGTGAT	PSMC3
CACACACACCTCGATGACGT	PSMC3
CACGCTCACCTGTCGTGTAG	PSMC3
CCTTGTCTCCAACGTCATCG	PSMC3
GATCAAAACCTCTACACGAC	PSMC3
TGTCCAGCAGCCGTGTGCGC	PSMC3
AGAAATTGTCCGATGACCAG	PSMC4
ATCGGCATCGATCCCCCCCG	PSMC4
CAGGATGCGCACATAATAGT	PSMC4
CTTGAGCAGCTCCCGATCGA	PSMC4
GCGAATCCAAAGCATCCCGC	PSMC4
GTACCTTGTAGCGGCTGTAC	PSMC4
AGGAACGAACTAAATGCTAA	PSMC5
ATGATAAGAGCCAAAACCTC	PSMC5
CACCTGGAGTTCTTCAATCT	PSMC5
CCGGACTACTTCCCCCACAT	PSMC5
CCTATGTGGGGGAAGTAGTC	PSMC5
ACGAGCCGTTGCTAGCCAGC	PSMC6
CGGACGGCCATGGCCATTCC	PSMC6
GATGAGAAGCCGTCTCTCAT	PSMC6
TCCTGAAGCGCCTTATCTCT	PSMC6
TGCACTCACACTCCTTAAGA	PSMC6
TTAAGAAATTGCAGTCCAGC	PSMC6
ATGCAGTTGTTAATGACTTC	PSMD1
TCAATTCATACCTTAAGCTG	PSMD1
TCACTACACCAAACAATGTG	PSMD1
TGAAGATGAACCACAGCTTA	PSMD1
TGTGATCATCTAGACATCGC	PSMD1
TTACGATGCCTTCCAATCTC	PSMD1
CCAAGTGTGTGCTGATGATT	PSMD11
CCCAGTGAAGCGTGACATTC	PSMD11
CTTTGTACTTTGATACCAAG	PSMD11
GGATCTCTCCTGGCAAAGAC	PSMD11
GGCAGGCTCTGACAGATTAC	PSMD11
TACCAGGAAGCATTGCATTT	PSMD11
ACCCTTACAGGCTTCCGATA	PSMD12
CTGTGCTAGGTGGAAACCTA	PSMD12
GAATGTAATCCTTCACAGCT	PSMD12
TCACTACTGCAACTAAGATA	PSMD12
TCCCCAGAATATTAGAATAA	PSMD12
TGTTATCCGAGTATAATACT	PSMD12
AATTCAGTTGTTGTGCCTCA	PSMD13
AGCTCTAAAATTAAACATCG	PSMD13
ATCTCACCTTTGTAACCTGT	PSMD13
CCGCAGAGCATCTTTGTAGT	PSMD13
CCTACTACAAAGATGCTCTG	PSMD13
GCTTCATTAGCTGCTAAATC	PSMD13
ATACTAACCTGGCCCAGTCC	PSMD14
ATCAAACCCATAACTTCCAT	PSMD14
ATGGACAGACTTCTTAGACT	PSMD14
GTGTTTGCTATGCCACAGTC	PSMD14
TGCCACAGCTCTCTCCGACA	PSMD14
TTCAGGCCGGAGATGGTTGT	PSMD14
AAATTTCTGCGTCCACACTA	PSMD2
AACCTTAATGTAGTCCTCAG	PSMD2
ACACAACCTCCAGTGCAGCC	PSMD2
AGTACAGGTACTTGTCAATC	PSMD2
CTGTCCTGTAGGGAAGGGTG	PSMD2
CTTCGCAATTCCTCCAGCGC	PSMD2
ACGCTTCGGCATGACGCAGA	PSMD3
AGCCTATCTCCAACTCCTCG	PSMD3
AGGGCCCGCAGCACGAATCT	PSMD3
CATGCCGAAGCGTAGCTGTC	PSMD3
CTACAAGGTCTAGGGCCCGG	PSMD3
TTTACAGTTCCGTCCCCGCA	PSMD3
AGATGTGTCCATAGCTGAGC	PSMD4
CAGTGCGGCCAAACTCTTGC	PSMD4
CATACTTAGCCAGTGTGATA	PSMD4
CTCTTCCTCAGAGTTTGGCC	PSMD4
CTTCTGCACGGGCATCCGCG	PSMD4
TAGGACTCACATGGGCCACG	PSMD4
AAACCGCCTAAAAGTGTATC	PSMD6
CCACGTCTATCTGCCAGTCG	PSMD6
CGAAATTCGCGATGCAATGA	PSMD6
GGCTATTCGTGATTTCAAAC	PSMD6
TCTAAATTAGGGAACTGTCC	PSMD6
TTTGTCATATGTCTTGCGAA	PSMD6
ATGACAAAGACGATTCTGTA	PSMD7
CTAGCCAGGGAAAGAATAGT	PSMD7
GCACACCAACAACACGCTTC	PSMD7
GTGTGGTGGATCATTTCAAC	PSMD7
GTGTGTCGCGATGCCGGAGC	PSMD7
TCATTCAGAATCGGCAAGGT	PSMD7
CCAATGGAGCATCCTACGCA	PSMD8
CCCCTCCTTCGAGCGCTACA	PSMD8
CGCACCTGATAGTGTCGAGC	PSMD8
GCAGCCGCTCCAACTCCGTG	PSMD8
GCTTCTGCAGTACCTGATGG	PSMD8
GGCTGAGTTCCACACGGAGT	PSMD8
AGCCAACTTGAGCAATCTGA	PSME1
ATCCAGCTCAGAAATCTTCT	PSME1
CATGTCTTACCTTGGTACAG	PSME1
CCCCAAGAAGATTTCTGAGC	PSME1
GGCCTTCAGATTGCTCAAGT	PSME1
TCGTGAAGACCTCTGTACCA	PSME1
CACTCACATAGAAGGCCCTC	PSME2
CCACATTGCAGATGGATTAC	PSME2
CTGATCCCCAAGATTGAAGA	PSME2
TCACTTGCAAGAGCTGATTC	PSME2
TCTGTGGCAAGAATCTGTAG	PSME2
TCTTAACACAGGTGATTACA	PSME2
AGCCCACTTATAAGAAGCGA	PSME3
AGGTCATGGATGTTTAAGAT	PSME3
CAACCTTCGCTTCTTATAAG	PSME3
CAACTTTGGGGTGTCCATTC	PSME3
CTTCTCACCAATAGCCATGA	PSME3
TTGACCTCCAGGTCAAAATG	PSME3
AGCATGAATTTGACTCCCGA	PSME4
ATTCATGCTTGTGAGATCCT	PSME4
CTTCTGAATTATCAAGTATG	PSME4
GTCATTGTTTCTTATTATAA	PSME4
TGTGTAACACCTTGTCTATC	PSME4
TTCTTAAGGCCTGATAGACA	PSME4
ACCCATCCTTATACTCATAC	PSMF1
CCTTGTGAAAGCCATCACCG	PSMF1
CTAATGTAAGCAGTCCCCAC	PSMF1
CTTCGGTCTCGTATTGTGTC	PSMF1
GGAGAAGACTTAGACCCTTT	PSMF1
TTATATCGATGCAGAACACC	PSMF1
AAGATGAAGATGCACATGTC	SHFM1
AGAGCTGAACTAGAGAAACA	SHFM1
ATGACTTCTCTAATCAGTTA	SHFM1
GATGTCAGAGAAAAAGCAGC	SHFM1
TCTAACAGACCTAAGTCTAC	SHFM1
TTTGAAGAGTTCCCTGCCGA	SHFM1
AAAAGCAGCAGGAGCTACTT	ACIN1
AAGGAGAAAGACGATCATCT	ACIN1
ACCTTTCTCTTCAGAAATTG	ACIN1
CAGTTTCATAAAACAGTATC	ACIN1
GGTTGGCATGAGTACGTGCC	ACIN1
TTTCGATCTTCAGTCAGTCG	ACIN1
AAAAAGAGATTGTCAAATCA	AQR
ATACTTACCTTTATATCAAA	AQR
TATTAGAAAGATAATGCTCT	AQR
TGCAGTTAGCATGTAAATAC	AQR
AGCAGTTAGAATTGAGAATC	BCAS2
TAGCTCAGGTAGTTCTTAGT	BCAS2
TATGATTGAACACGCACAGA	BCAS2
TCTTTCTTAGGCTGCAGCGC	BCAS2
TTACTCATTGTATACTTTCC	BCAS2
TTGAATTGCTCAGTATGAAA	BCAS2
AGCTGAAACAGAACCGCATG	BUD31
ATCATCGAGTGCACACACTG	BUD31
GATGCAGTTCGTCCCGAAGT	BUD31
GGAGTTGATTGAGCCAACAC	BUD31
ACCTGGCCAACCTCGCTCCT	CCDC12
ACTCACCACCTCCTCGATGA	CCDC12
ACTCACCAGTCAGGCTTCCG	CCDC12
CAAGCCCGAGCCCGTCATCG	CCDC12
CCCCAGGCCAAACCGGTTGC	CCDC12
TTGCTTACCTGCAACCGGTT	CCDC12
ACAGATCGAAAAGTTGAAGC	CCDC40
ACTTGATGATTATCTAATGA	CDC40
AGAGGCGCATCATGCAGCAA	CCDC40
AGCCATTTGCTGTGTCCTAA	CDC40
AGGTCTTGGTGTAGAGAGCG	CCDC40
ATTATACTGAACTTCTTTGA	CDC40
CAAGTGTCTGCTAAATATAT	CDC40
CGAGATCGACGCCATCAGCG	CCDC40
GAGTCACGACCGCCACGCAA	CCDC40
GCCCCTGATGGTAAGATTCC	CCDC40
TGAGACCATGTTTGCTCCTG	CDC40
TTGGACCAGAAAATCCCTTT	CDC40
AATTGCACGTCAAACTGCCG	CDC5L
CAAGTTAAACATTAATCCCG	CDC5L
CCCGGAGTAGAGTTAATAAC	CDC5L
GACGTGCAATTTCACTCGCT	CDC5L
GAGAAGTCACTCTCATGCAA	CDC5L
GTCTGTACAACTTGTCGCTG	CDC5L
ACCTGTTCCTGGGCCTGTCG	CHERP
AGATCACGAGTACAAGCCTT	CHERP
CGACAAGCTCGCCCAGTTCG	CHERP
CGATGACATTTCGAAGCTCC	CHERP
GGCGGGTGCTCGTTGATGCC	CHERP
TGGGGCATTACCTTCACGAG	CHERP
AAAGCCTAAAGGAGATTCAA	CRNKL1
AACGTTCCAGAAGGACACTT	CRNKL1
ACTGGATAAAATACGCACAA	CRNKL1
ATCTCTAATGACGGCAACAG	CRNKL1
GCAGTTATCTGTACCTCAGC	CRNKL1
TCATCTGTGATCTTCTGTTG	CRNKL1
ATAGGGGCACAAAACGTCCC	CTNNBL1
CAAACTGGTACTCGAGAACG	CTNNBL1
CCGGCCTGAGATGTGTACAG	CTNNBL1
GCCACTGTAGAAGACCCTGC	CTNNBL1
TCATTTCTTCTTCCCGATAG	CTNNBL1
TTAGAAAACAGGGAATTGCT	CTNNBL1
AGGTTCGTAACCGTGACTTC	CWC15
CCAACCTTTGAACCTGCCAG	CWC15
CTTCAGTGTCAAAAAAGCCA	CWC15
GTCATCTGCATCAAGGTTGG	CWC15
TGCAGCTCTTCTTGCAGAAC	CWC15
AATGGAGAAGAGGCGAACCC	DDX23
ACAAGGACCGTAAACGATCC	DDX23
AGAAGCTCCTCCAGGGATAA	DDX23
CAGGTGCAGTTGTTAGGGCG	DDX23
TCAGGCCCAGCCATTATCCC	DDX23
TCATGTACCTGGATCGTTTA	DDX23
CATGACCCCCCACGAGAAGC	DDX39B
CCTGCCTAAGGTGTCTGTAC	DDX39B
GATGTGTCACACTCGGGAGT	DDX39B
TGAGGCTCTTATTTCGAGCC	DDX39B
TGTCTTTCCCATGCCCGACT	DDX39B
TGTTCTTGTAGACATGCGTC	DDX39B
AGGCAGCTAGAGACATGAAG	DDX42
CCATACCTCTGAATGATCAA	DDX42
GAATGGAATTGCTGGCGAGT	DDX42
TCATCGCTGTCAGAATCTAC	DDX42
TCCTGAACCACACCAGCAGT	DDX42
TGACAGCGATGATGATCCCT	DDX42
AGGTCCAAAGAGAAAACTGA	DDX46
ATAAAAGAAGATCTCGGTCA	DDX46
GAAAAAAGACAAAGATGACA	DDX46
GCTACCTCTGTTGCTGCCCG	DDX46
GGAGAGAGAGGTCTCGTAGC	DDX46
TAGCTGCCCCAACCATTATG	DDX46
ACCCACTGCTATTCAAGCTC	DDX5
AGGTTTGGTGCACCTCGATT	DDX5
GCCCTACTTCCTCCAAATCG	DDX5
GTAGCACTTACCAGGGAAAT	DDX5
TAGGCCCATCGCCTCTCTCT	DDX5
TCCCTGAGCTTGAATAGCAG	DDX5
GAGTACATGCGATCATTACC	DHX15
GAGTTGCCTGTACCCAACCC	DHX15
GGAGTATAGAAGATCTCAAC	DHX15
GTGTACGCCCAGGAATAGTT	DHX15
TGGTGTAATAATTCTTGATG	DHX15
TTATTACACCATAACGCTCC	DHX15
CTACTGACAGGTACCACGAA	DHX16
CTGTCGAACCCGCTCAGCAA	DHX16
CTTCCAGTAACCTATAAGAT	DHX16
GAAGCGCCTCAAGATGGCCG	DHX16
TGGGACTCACCATGGCCTTC	DHX16
TTCGACAGCGGGACAAGGAT	DHX16
CCAATGCCAACCAGCGGTCA	DHX38
CCCTTCCTAGGGTCGAGAGG	DHX38
CTAGGTGGTCTGACCTCTAC	DHX38
GCTGATGGTGGAGTTCCCGC	DHX38
TAGGTCAAATGATCGCTCTC	DHX38
TGCCGGCTCGCCCTGACCGC	DHX38
GCCTGGCTCCGACCCGATTA	DHX8
GCCTTAATCGGGTCGGAGCC	DHX8
GCGAAGCCTTCCACTAGCAA	DHX8
TGCGTCTCATACAAACCATG	DHX8
TTGTCCGGTTGGCAAAGGAC	DHX8
ACCTGTTACGGTGTATGAGA	EFTUD2
CAGTTTCTTGGCGGATCTGA	EFTUD2
CTCCATCAGAGTGAATTTCT	EFTUD2
TCATAGCGCTTTCTGATTTC	EFTUD2
TCCATCTCATACACCGTAAC	EFTUD2
TCCGTCTTACCTTGCCATGG	EFTUD2
ACAGAGAATTGTACATACAC	EIF4A3
CACGATGGCGACCTCGGGCT	EIF4A3
TGCTTACCAAAAACACGCCC	EIF4A3
TGCTTATTTCTACAGATGTC	EIF4A3
TTACGGACAGCATGTTGTCG	EIF4A3
AACAAGCATACCTCTTTGGC	HNRNPA1
CTAAAGAGCCCGAACAGCTG	HNRNPA1
CTTACTGACAATCTTATCCA	HNRNPA1
TATTAGGATTCTCAAAGACC	HNRNPA1
TCTCTGGAGACAGCTCTCTT	HNRNPA1
AGCCCTGCCAAAGCAAGAGA	HNRNPA1L2
CAGAACCCCTTCGACCTCTT	HNRNPA1L2
CGAAGGGGTTCTGGAAACTT	HNRNPA1L2
GGTGGTCGTGGAGATGGTTT	HNRNPA1L2
TATGAATACAACGCCACACA	HNRNPA1L2
TCAGAAATACCATACTGTGA	HNRNPA1L2
CAGTTGAGAAAACTGTTTAT	HNRNPA3
CTCTCAGGGCCATGATCCAA	HNRNPA3
CTGATTTCAGGTAACTATGG	HNRNPA3
GATACAGTTGATAAAATTGT	HNRNPA3
TTGTAGGATTCTGTAAAGCC	HNRNPA3
ACTTCACGAAGGGGCAAAAG	HNRNPC
AGGTGTGAAACGATCTGCAG	HNRNPC
AGTGAAAGGAGATGACCTTC	HNRNPC
ATACATACACTTTCCAGACT	HNRNPC
GCAGAGCCAAAAGTGAACCG	HNRNPC
GCTCCTTCTTAATGGCCTGA	HNRNPC
ACGCATTCTGCTTCAGAGCA	HNRNPK
CCACAGTACCAACACTATAA	HNRNPK
CTTCTCACCAAATTCACCAT	HNRNPK
TAAAATCAAAGAACTTCGAG	HNRNPK
TAAACGCCCTGCAGAAGATA	HNRNPK
TTCCCTAACACTGAAACCAA	HNRNPK
ATCCTGATGGTGAACATGCC	HNRNPM
CGCTCAGACTATGCTTGTTT	HNRNPM
CTAAACAAGCATAGTCTGAG	HNRNPM
CTTACCATCTTGACGTGCAT	HNRNPM
GTAATACCAGCTATGTTCAA	HNRNPM
TAGACCAATGCACGTCAAGA	HNRNPM
AAAAGACCACGAGAAGATCA	HNRNPU
GACATACATGAAGTTCGTAT	HNRNPU
GCATCCTATGGTGTGTCAAA	HNRNPU
TGAACACTTCGATGACACAG	HNRNPU
TTGAAGAGAACAAGTATAGC	HNRNPU
AACCGGCATGGCCAAAGCCG	HSPA1A
CACCATTGAGGAGGTAGATT	HSPA1A
CCCCTAATCTACCTCCTCAA	HSPA1A
CCCTGAGCCCCGAAGCCCCC	HSPA1A
GCCTGGGGGCTTCGGGGCTC	HSPA1A
GGTGCTGGACAAGTGTCAAG	HSPA1A
CACCGGCATGGCCAAAGCCG	HSPA1B
CCCCTAATCCACCTCCTCAA	HSPA1B
CCCTGAGCCCCGAAGCCGCC	HSPA1B
GCCTGGCGGCTTCGGGGCTC	HSPA1B
GGTTCTGGACAAGTGTCAAG	HSPA1B
TACCATTGAGGAGGTGGATT	HSPA1B
AATCGCCATAGGCATCGACC	HSPA1L
AATGCAACGAGCTCCTTTCG	HSPA1L
AGGCACATACCCTGTTCCGC	HSPA1L
CAACTCTTCAAATCGAGCTC	HSPA1L
GATGCCTATGGCGATTCCCT	HSPA1L
TACCGCAGCCCCATATGCTA	HSPA1L
CCGCCTCACGGCGCGCTTGT	HSPA2
CGACGTGACCCCGTTGTCGC	HSPA2
GACCCCGACGCACGAATAGG	HSPA2
GATCTCGATGCTCGCCTGCG	HSPA2
GGCCCAACAAGCGCGCCGTG	HSPA2
GGCGAATCGCGACCGAGTCG	HSPA2
ATCCTCAGCCTTGTACTGCT	HSPA6
CAACACGTTGAGCCCCGCGA	HSPA6
CCAGATTCATGACGTCGTCC	HSPA6
CTGCGAGTCATTGAAATAGG	HSPA6
TCATGAAGCCGAGCAGTACA	HSPA6
TTGTGGCACTCAAGCCCGCC	HSPA6
ACAGATGCCAAACGTCTGAT	HSPA8
ACCATAGAAGACACCTCCTC	HSPA8
ATGCCTGGGGGATTTCCTGG	HSPA8
CTAGACTGTTACCAATGCTG	HSPA8
GAGATCGATTCTCTCTATGA	HSPA8
GTTTAAGCGCAAGCATAAGA	HSPA8
AGTACATTCTGAGGCCAGAA	ISY1
CCAGGCCCGAAATGCAGAAA	ISY1
CGTCTCCACTTCTCAGCTTT	ISY1
GGCCTTAGCAAGATTTCGCC	ISY1
TTAGGAACGAAGACCCTTTC	ISY1
TTCCCTCTTCCAGCTGAGCC	ISY1
ATCTCACCTGATCCACAGAA	LSM2
CACACAGTTGCTACAGGATG	LSM2
CGACCACATCCTTGCCCACA	LSM2
